# Supplementary material for: Quantification of microplastic targets in environmental matrices using pyrolysis-gas chromatography-mass spectrometry
Source: Royal Society of Chemistry journal article supplement (doi:10.1039/d4va00269e), 2024-11-08
Supplement: d4va00269e1.pdf [file d4va00269e1.pdf]

## Supplementary Information

### Pyrolysis-gas chromatography/mass spectrometry conditions

**Table S1**

Pyrolytic Conditions.

| <b>Pyrolysis Conditions</b> |                                                   |
|-----------------------------|---------------------------------------------------|
| Instrument                  | CDS 6200 pyroprobe pyrolysis unit with DISC inlet |
| Trap                        | Tenax-TA                                          |
| Carrier gas                 | Helium                                            |
| Pyrolysis temperature       | 610 °C                                            |
| Pyrolysis time              | 20 s                                              |
| Transfer line temperature   | 310 °C                                            |

  

| <b>Gas Chromatography Conditions</b> |                                                          |
|--------------------------------------|----------------------------------------------------------|
| Instrument                           | ThermoScientific Trace 1310 GC                           |
| Injector Mode                        | Split 20:1                                               |
| Injector temperature                 | 310 °C                                                   |
| Column                               | HP-1 fused, 60 m × 0.32 mm i.d. × 0.25 µm film thickness |
| Flow                                 | 2 mL min <sup>-1</sup>                                   |
| Temperature programme                | 40 °C (4 min) → 300 °C (15 min)                          |

  

| <b>Mass Spectrometry Conditions</b> |                                       |
|-------------------------------------|---------------------------------------|
| Instrument                          | ThermoScientific single quadrupole MS |
| Ionisation energy                   | 70 eV                                 |
| Scan speed                          | 5 scans s <sup>-1</sup>               |
| Scan range                          | 50–650                                |

# Chromatograms of each plastic standard, with and without thermochemolysis

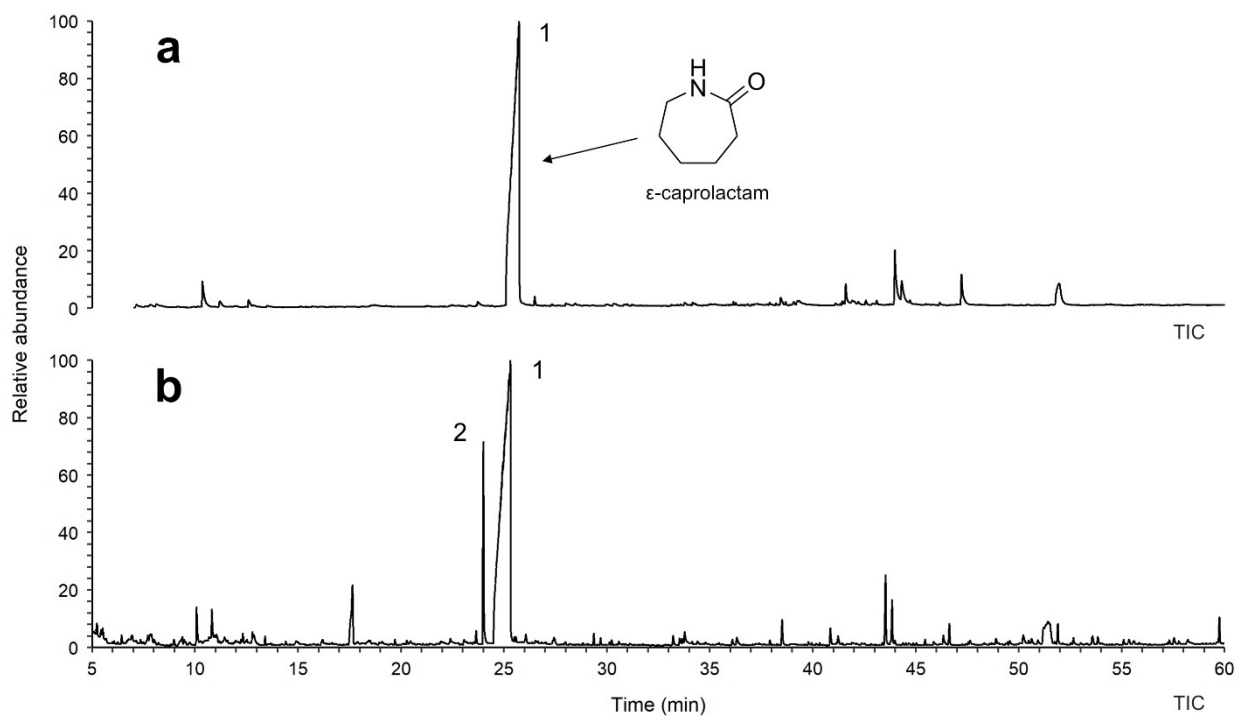

**Figure S1.** Py-GC/MS chromatograms of PA6 (a) without thermochemolysis and (b) with thermochemolysis. See Table S2 for peak identification.

**Table S2**

Characteristic pyrolytic products of PA6, with their respective labels.

| Peak | Compound      | Peak | Compound             |
|------|---------------|------|----------------------|
| 1*   | ε-caprolactam | 2†   | N-methyl caprolactam |

\* = selected diagnostic compounds

† = thermochemolytic product

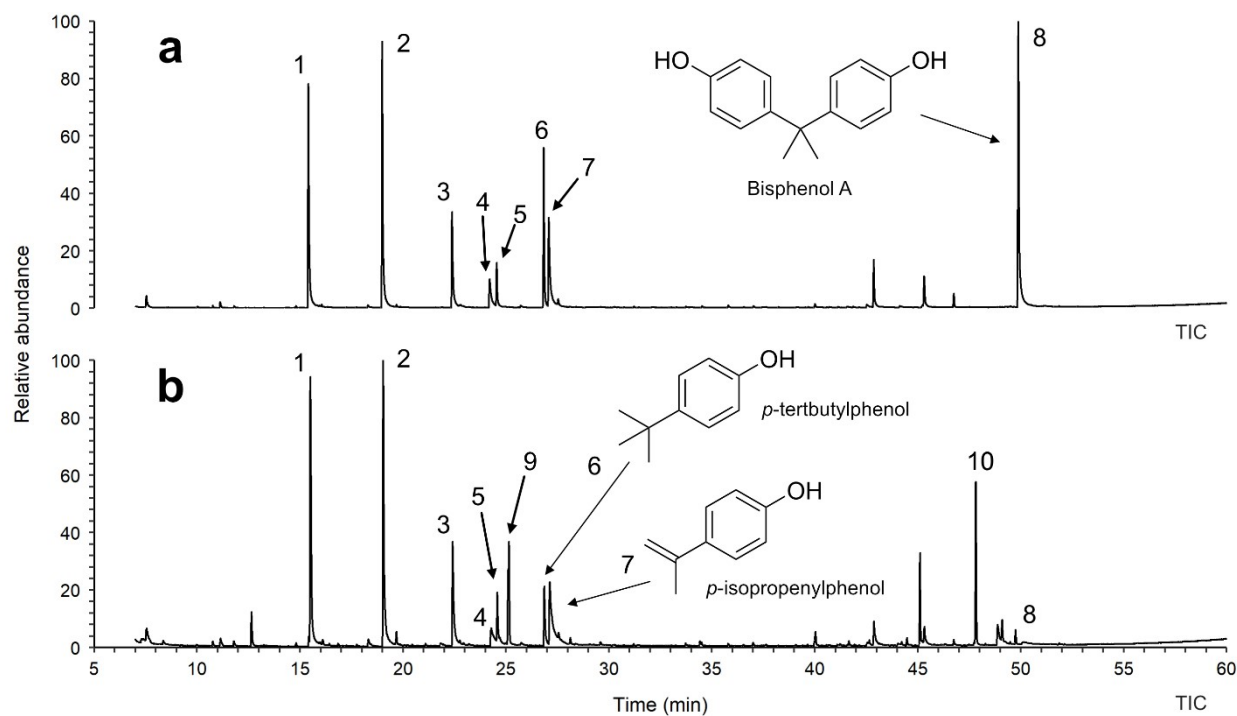

**Figure S2.** Py-GC/MS chromatograms of PC (a) without thermochemolysis and (b) with thermochemolysis. See Table S3 for peak identification.

**Table S3**

Characteristic pyrolytic products of PC, with their respective labels.

| Peak | Compound                  | Peak | Compound                            |
|------|---------------------------|------|-------------------------------------|
| 1    | Phenol                    | 6*   | <i>p</i> -tertbutylphenol           |
| 2    | <i>p</i> -cresol          | 7*   | <i>p</i> -isopropenylphenol         |
| 3    | <i>p</i> -ethylphenol     | 8*   | Bisphenol A                         |
| 4    | <i>p</i> -vinylphenol     | 9†   | <i>p</i> -methoxy-tert-butylbenzene |
| 5    | <i>p</i> -isopropylphenol | 10†  | 2,2-Bis(4'-methoxyphenyl)propane    |

\* = selected diagnostic compounds

† = thermochemolytic product

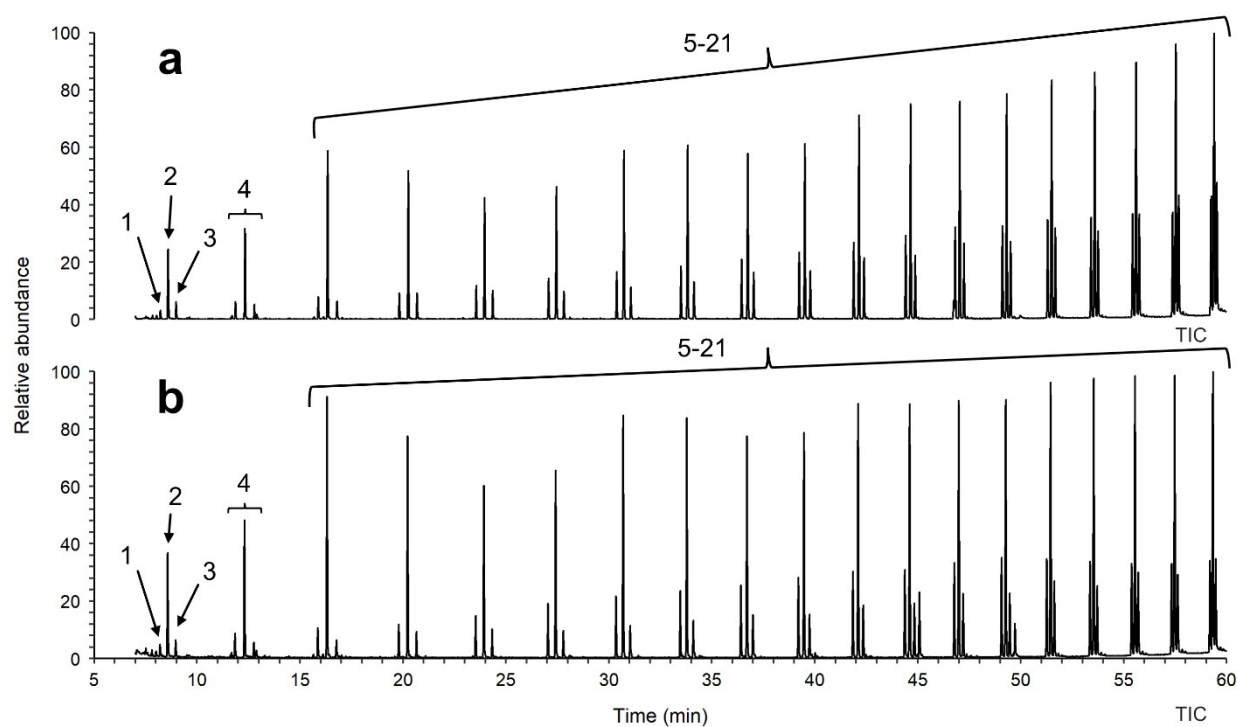

**Figure S3.** Py-GC/MS chromatograms of PE (a) without thermochemolysis and (b) with thermochemolysis. See Table S4 for peak identification.

**Table S4**

Characteristic pyrolytic products of PE, with their respective labels.

| Peak | Compound       | Peak | Compound  |
|------|----------------|------|-----------|
| 1    | Octa-1,7-diene | 3    | Octane    |
| 2    | Oct-1-ene      | 4    | Non-1-ene |

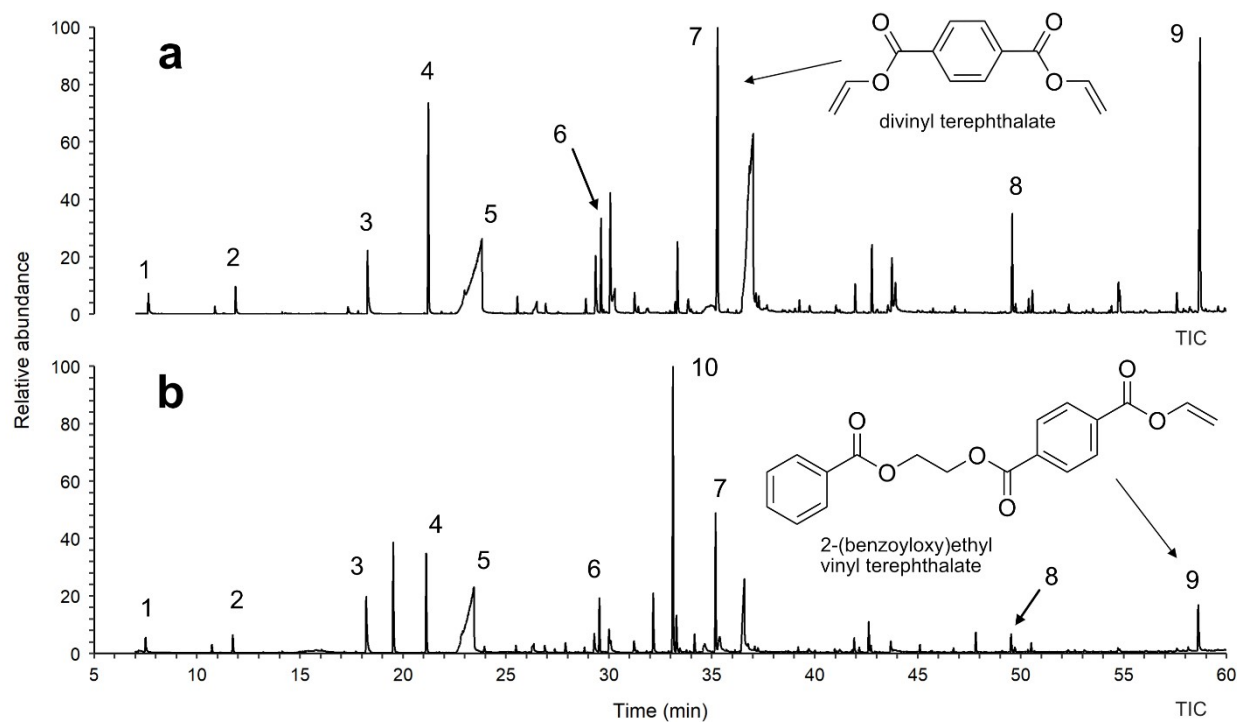

**Figure S4.** Py-GC/MS chromatograms of PET (a) without thermochemolysis and (b) with thermochemolysis. See Table S5 for peak identification.

**Table S5**

Characteristic pyrolytic products of PET, with their respective labels.

| Peak | Compound       | Peak | Compound                                |
|------|----------------|------|-----------------------------------------|
| 1    | Toluene        | 6    | Biphenyl                                |
| 2    | Styrene        | 7*   | Divinyl terephthalate                   |
| 3    | Acetophenone   | 8    | Ethane-1,2-diylidibenzoate              |
| 4    | Vinyl benzoate | 9*   | 2-(benzoyloxy)ethyl vinyl terephthalate |
| 5    | Benzoic acid   | 10†  | Dimethyl terephthalate                  |

\* = selected diagnostic compounds

† = thermochemolytic product

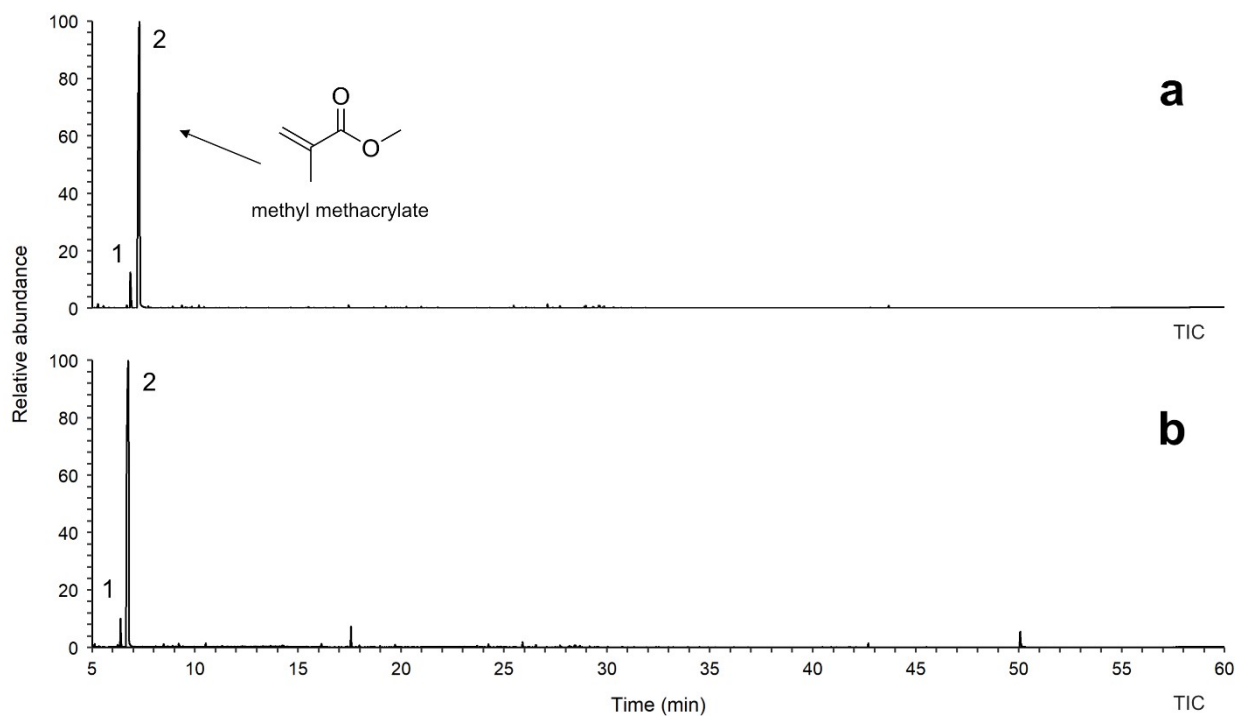

**Figure S5.** Py-GC/MS chromatograms of PMMA (a) without thermochemolysis and (b) with thermochemolysis. See Table S6 for peak identification.

**Table S6**

Characteristic pyrolytic products of PMMA, with their respective labels.

| Peak | Compound        | Peak | Compound            |
|------|-----------------|------|---------------------|
| 1    | Methyl acrylate | 2*   | Methyl methacrylate |

\* = selected diagnostic compounds

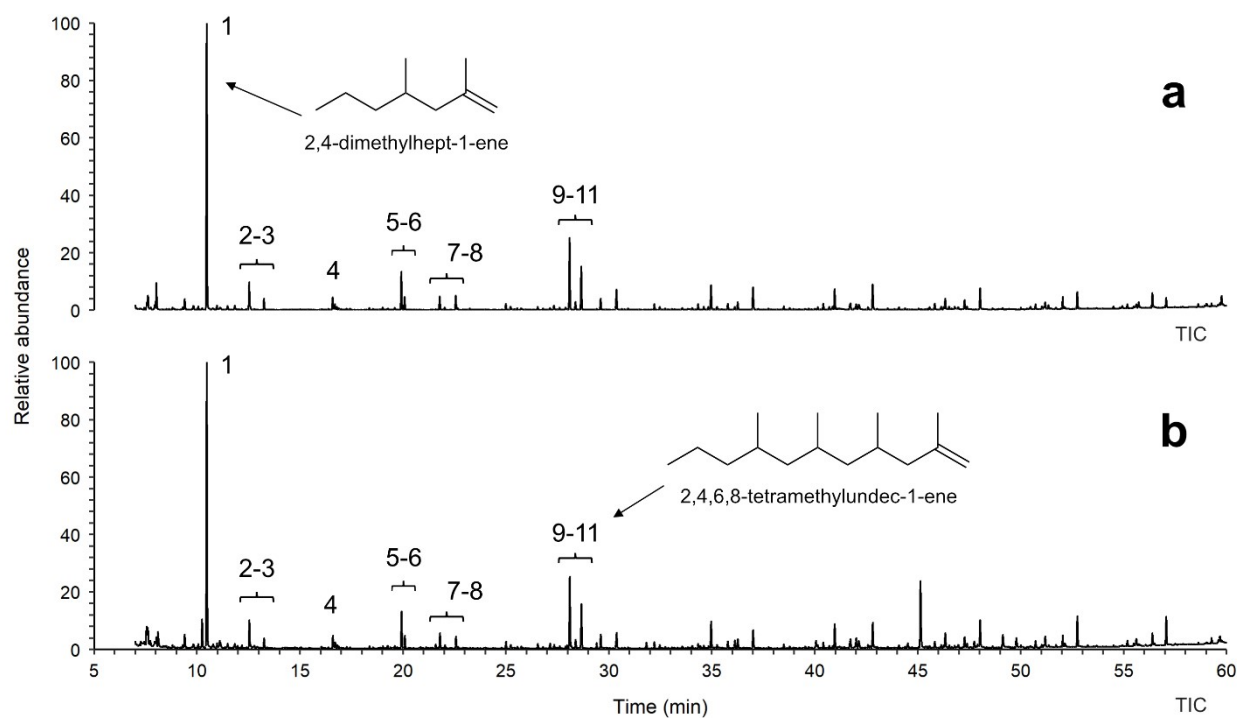

**Figure S6.** Py-GC/MS chromatograms of PP (a) without thermochemolysis and (b) with thermochemolysis. See Table S7 for peak identification.

**Table S7**

Characteristic pyrolytic products of PP, with their respective labels.

| Peak       | Compound                                                     | Peak         | Compound                                                                     |
|------------|--------------------------------------------------------------|--------------|------------------------------------------------------------------------------|
| <b>1*</b>  | 2,4-dimethylhept-1-ene                                       | <b>5-6</b>   | 2,4,6-trimethylnon-1-ene (meso and racemic)                                  |
| <b>2-3</b> | 2,4,6-trimethylhepta-1,6-diene,<br>2,4,6-trimethylhept-1-ene | <b>7-8</b>   | 2,4,6,8-tetramethylnona-1,8-diene,<br>2,4,6,8-tetramethylnon-1-ene           |
| <b>4</b>   | 4,6-dimethylnon-2-ene                                        | <b>9-11*</b> | 2,4,6,8-tetramethylundec-1-ene<br>(isotactic, heterotactic and syndiotactic) |

\* = selected diagnostic compounds

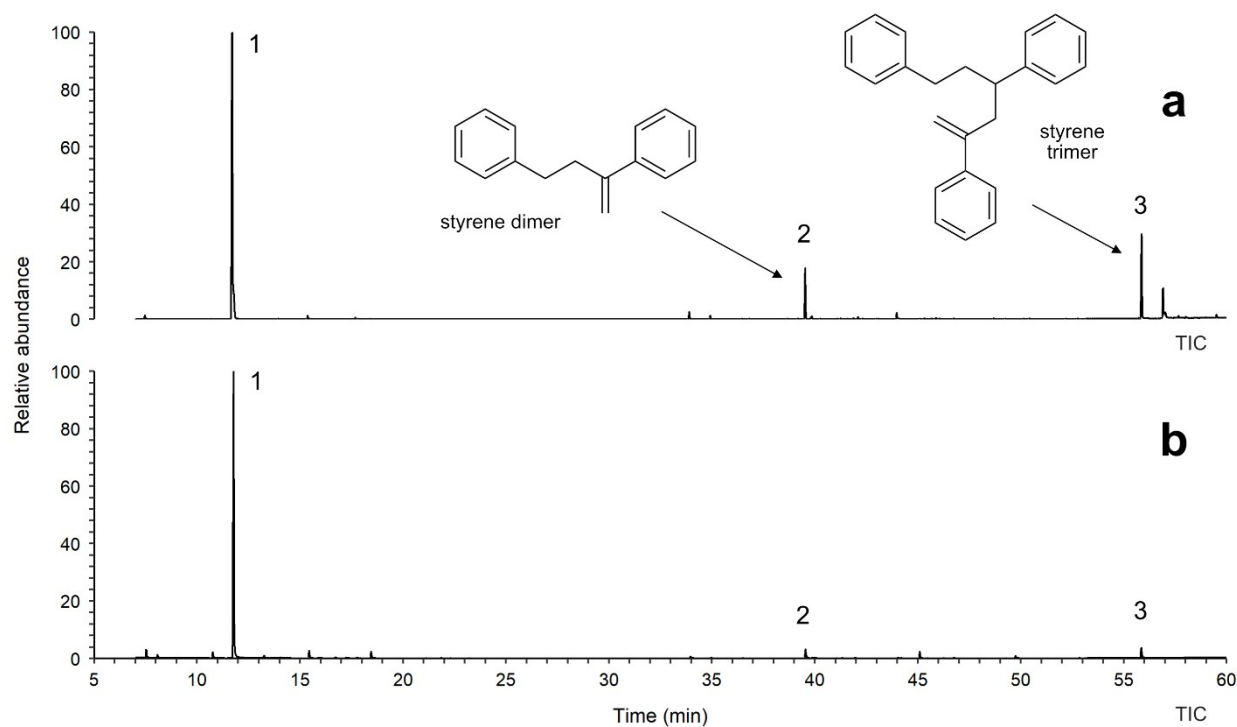

**Figure S7.** Py-GC/MS chromatograms of PS (a) without thermochemolysis and (b) with thermochemolysis. See Table S8 for peak identification.

**Table S8**

Characteristic pyrolytic products of PS, with their respective labels.

| Peak      | Compound                                       | Peak      | Compound                                            |
|-----------|------------------------------------------------|-----------|-----------------------------------------------------|
| <b>1</b>  | Styrene                                        | <b>3*</b> | Hex-5-ene-1,3,5-triyltribenzene<br>(styrene trimer) |
| <b>2*</b> | But-3-ene-1,3-diyldibenzene<br>(styrene dimer) |           |                                                     |

\* = selected diagnostic compounds



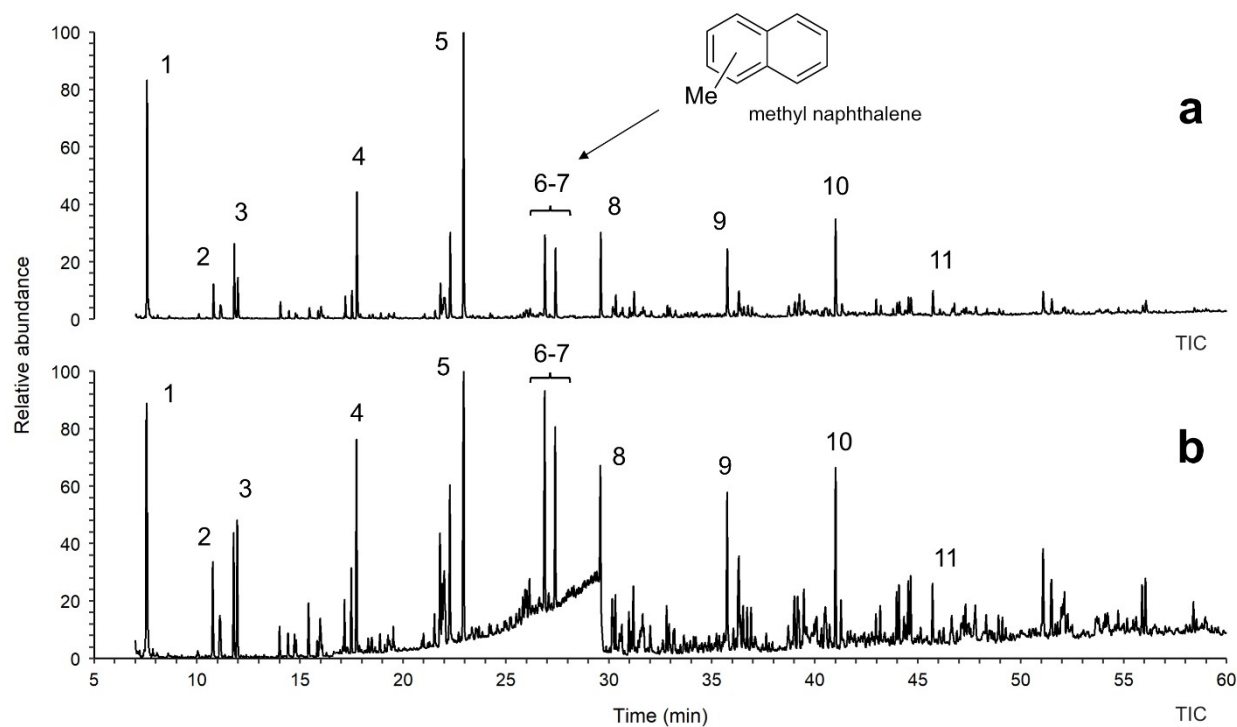

**Figure S8.** Py-GC/MS chromatograms of PVC (a) without thermochemolysis and (b) with thermochemolysis. See Table S9 for peak identification.

**Table S9**

Characteristic pyrolytic products of PVC, with their respective labels.

| Peak | Compound     | Peak | Compound            |
|------|--------------|------|---------------------|
| 1    | Toluene      | 6-7* | Methyl naphthalenes |
| 2    | Ethylbenzene | 8    | Biphenyl            |
| 3    | Styrene      | 9    | Fluorene            |
| 4    | Indene       | 10   | Anthracene          |
| 5    | Naphthalene  | 11   | Pyrene              |

\* = selected diagnostic compounds

## Filtered chromatograms and mass spectra for each plastic standard and selected diagnostic compounds

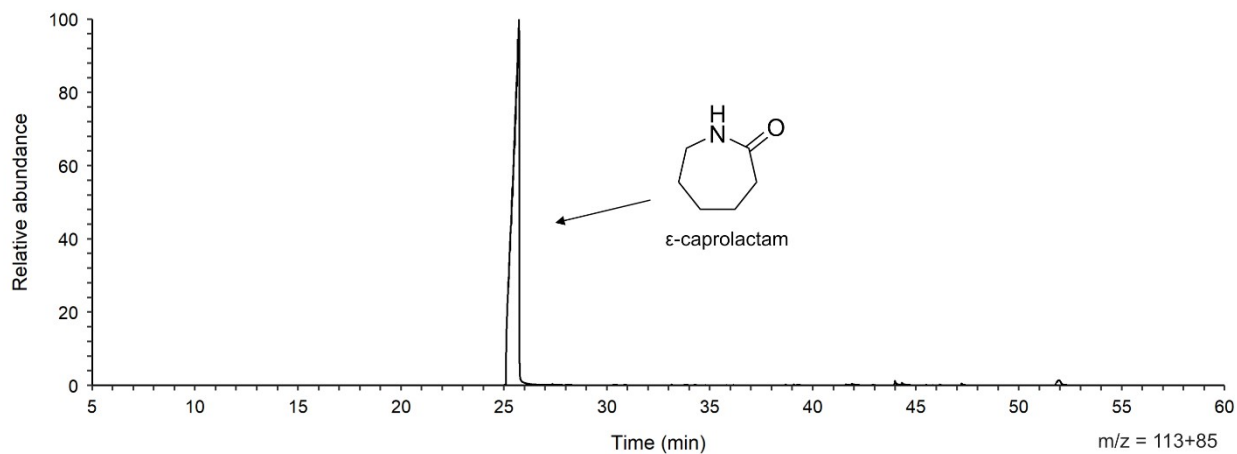

**Figure S9.** Py-GC/MS chromatogram of PA6 filtered by  $m/z$  113+85.

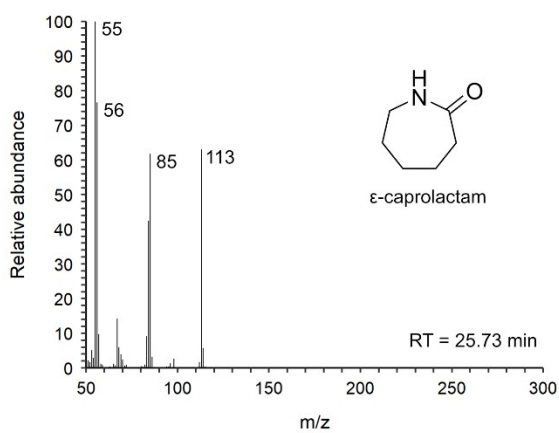

**Figure S10.** Mass spectrum of  $\epsilon$ -caprolactam taken from the pyrogram of PA6 above.

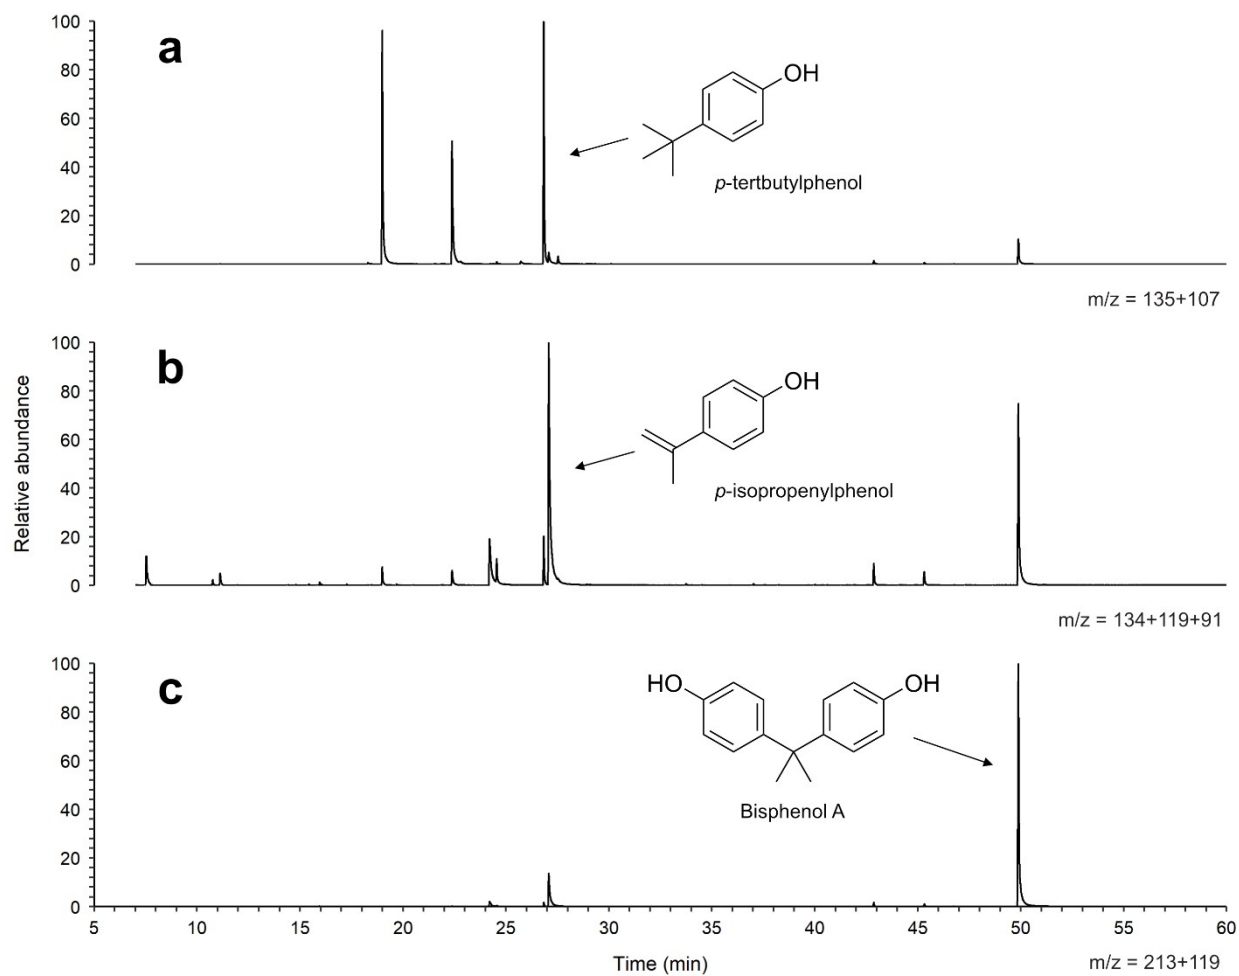

**Figure S11.** Py-GC/MS chromatograms of PC filtered by  $m/z$  (a) 135+107, (b) 134+119+91 and (c) 213+119.

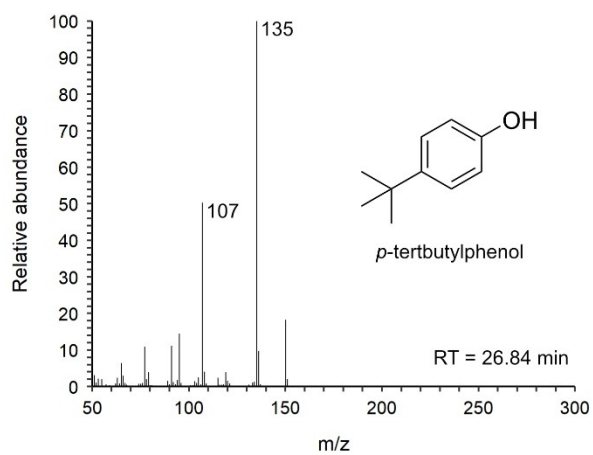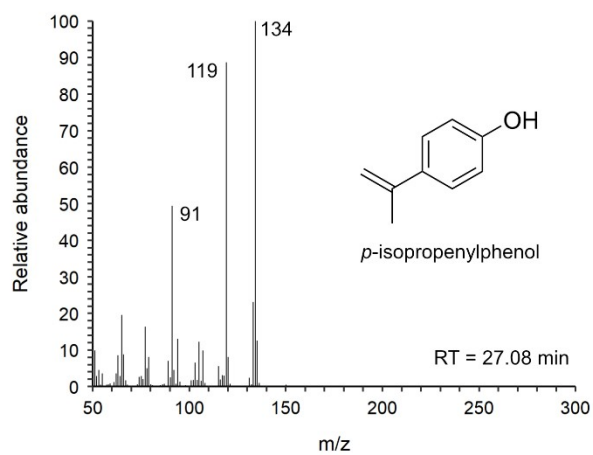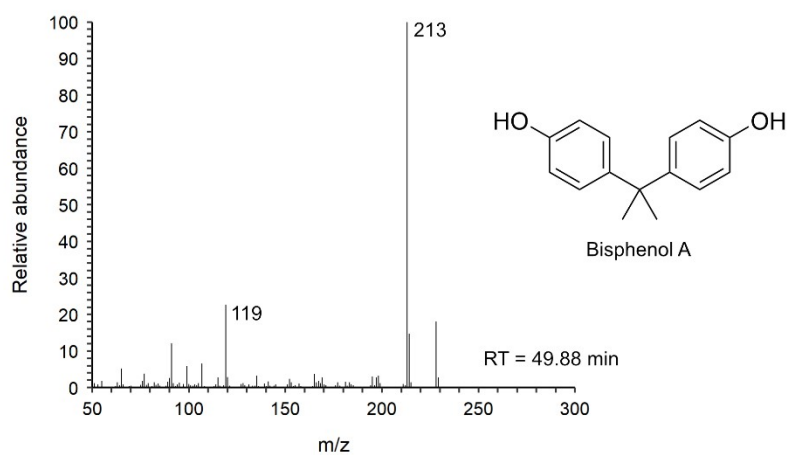

**Figure S12.** Mass spectra of (a) *p*-tertbutylphenol, (b) *p*-isopropenylphenol and (c) bisphenol A taken from the program of PC above.

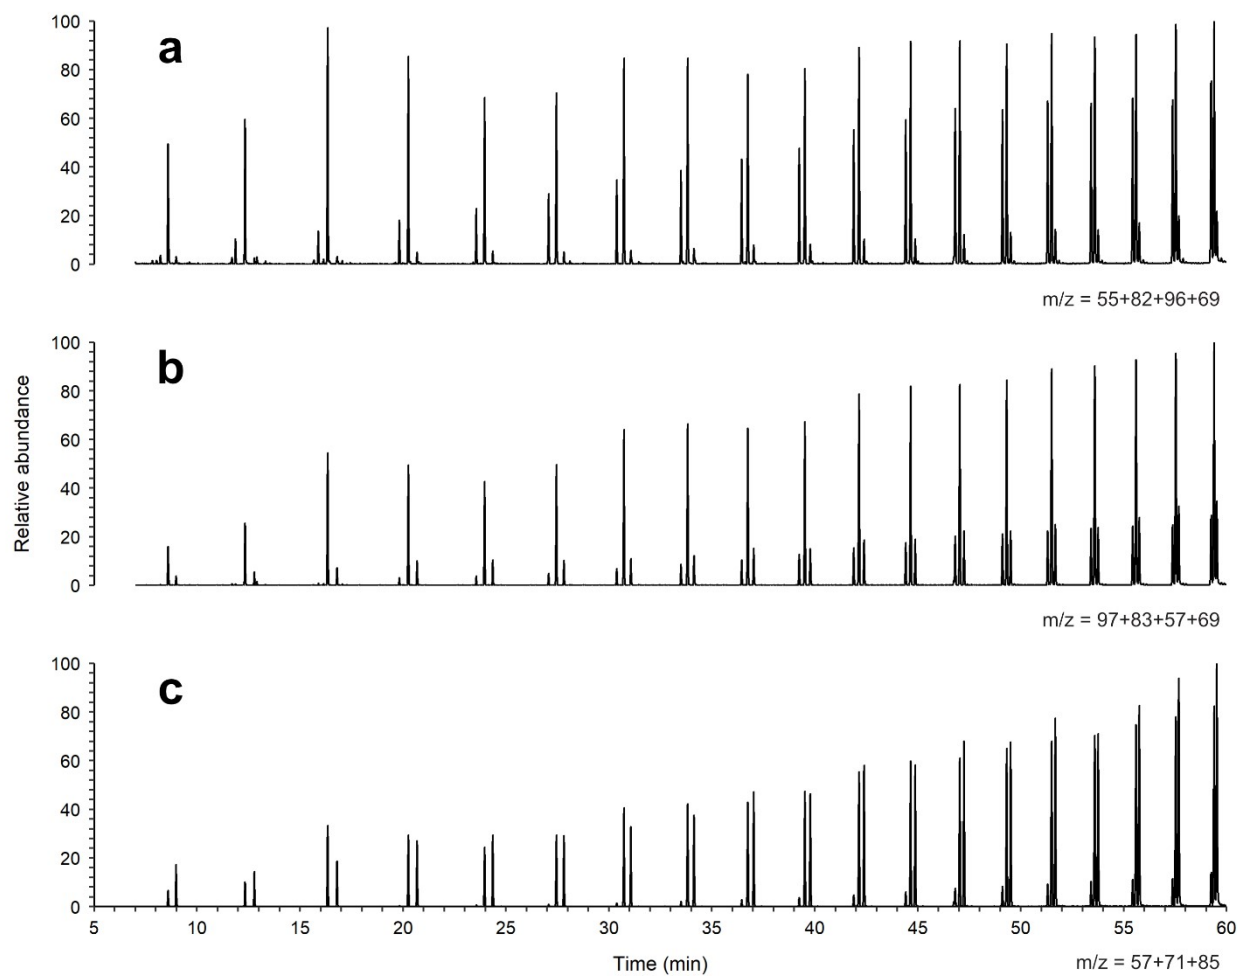

**Figure S13.** Py-GC/MS chromatograms of PE filtered by  $m/z$  (a) 55+82+96+69, (b) 97+83+57+69 and (c) 57+71+85.

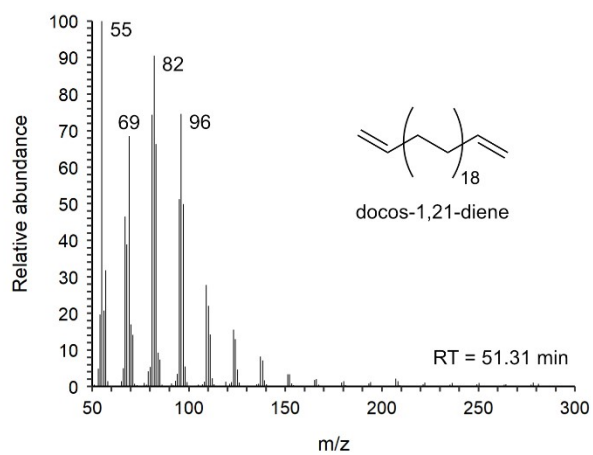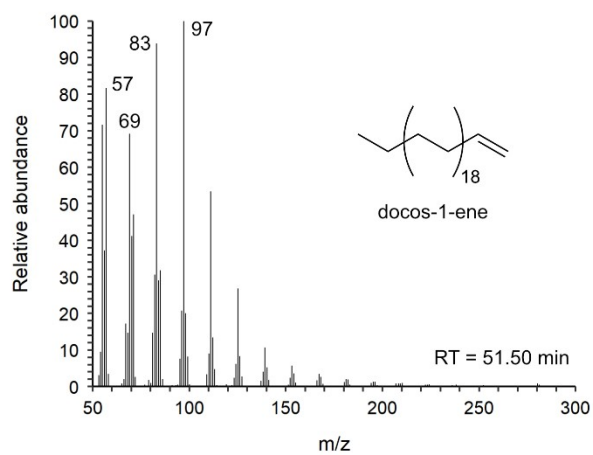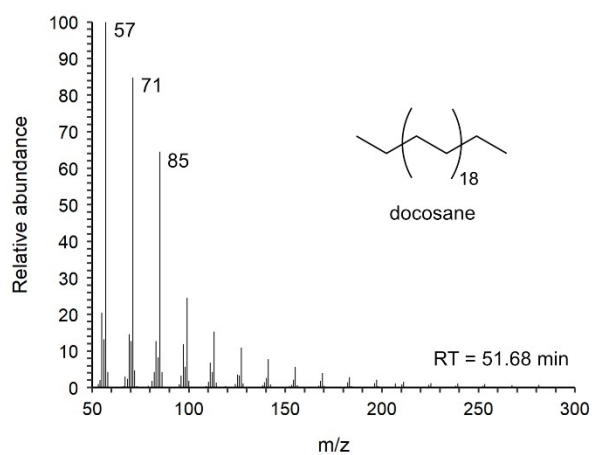

**Figure S14.** Mass spectra of (a) docosa-1,21-diene, (b) docos-1-ene and (c) docosane taken from the pyrogram of PE above.

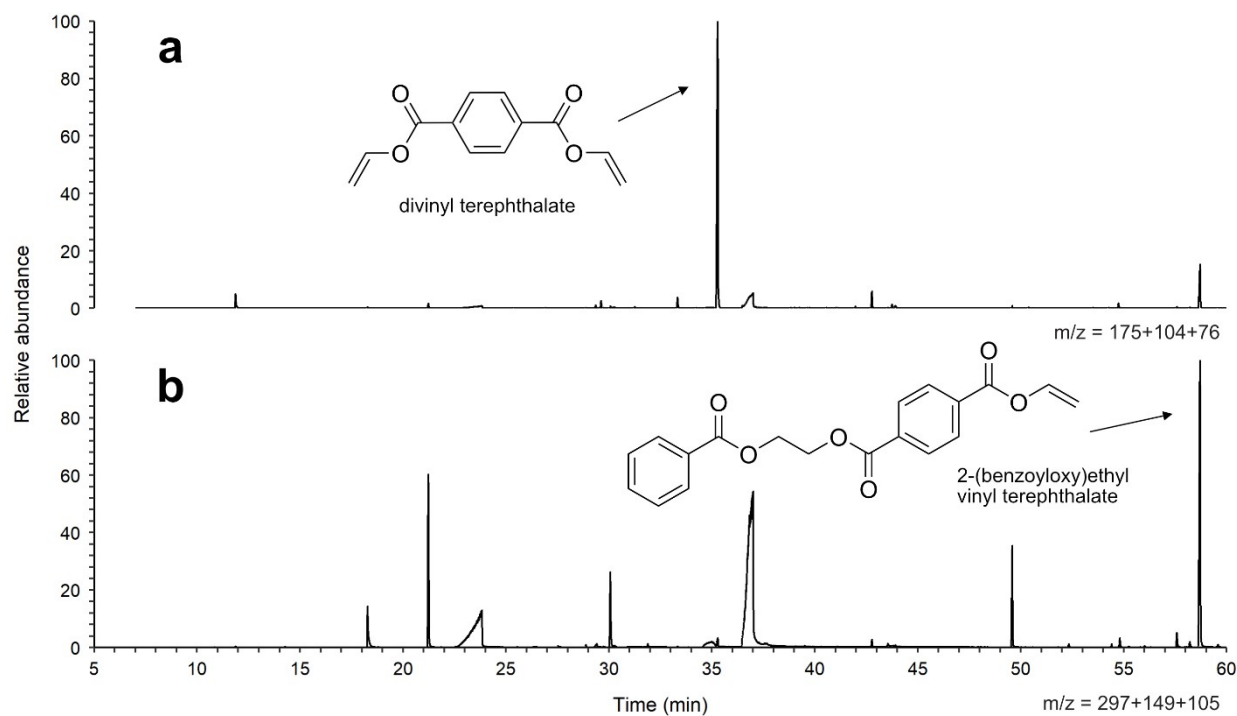

**Figure S15.** Py-GC/MS chromatograms of PET filtered by  $m/z$  (a) 175+104+76 and (b) 297+149+105.

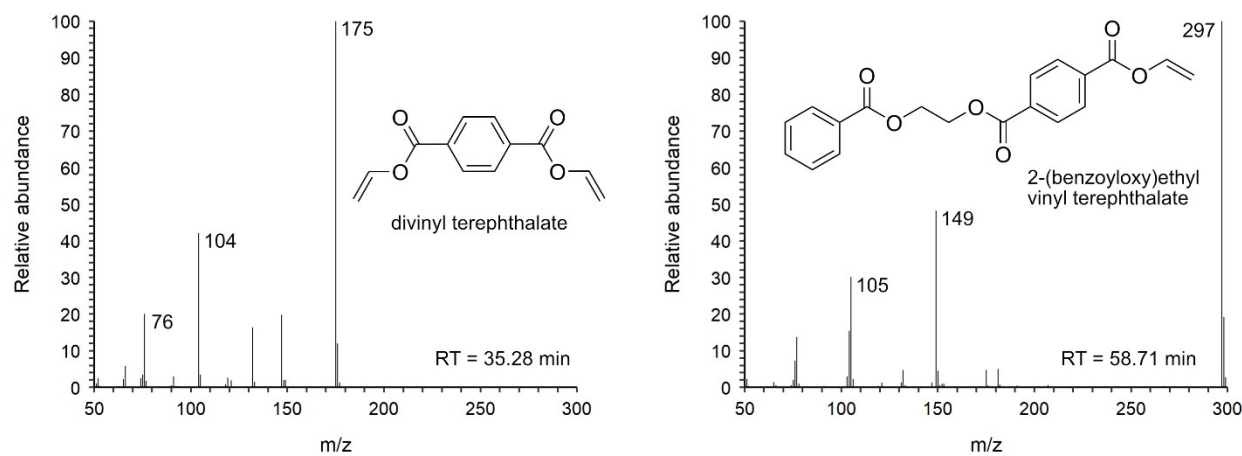

**Figure S16.** Mass spectra of (a) divinyl terephthalate and (b) 2-(benzoyloxy)ethyl vinyl terephthalate taken from the pyrogram of PET above.

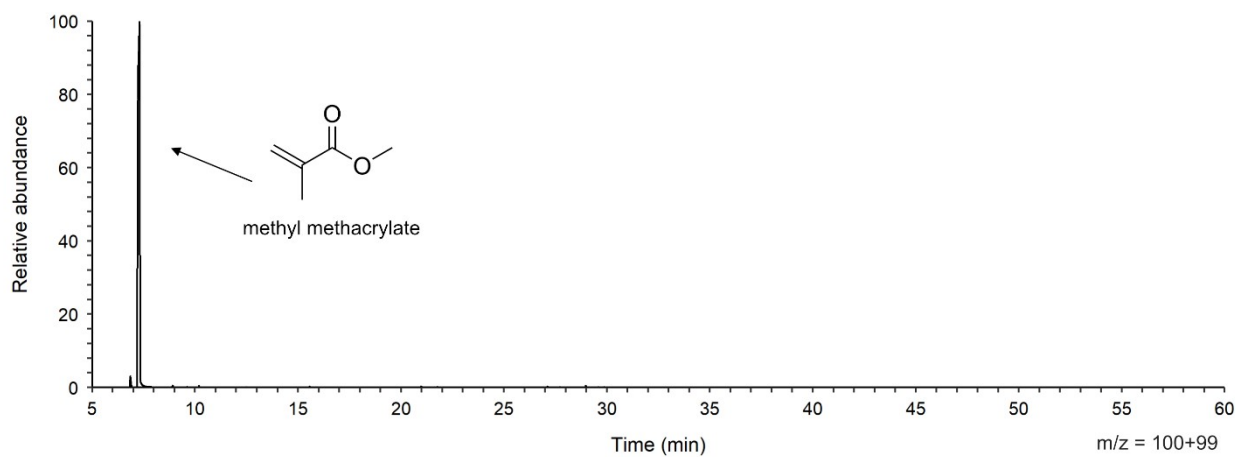

**Figure S17.** Py-GC/MS chromatogram of PMMA filtered by  $m/z$  100+99.

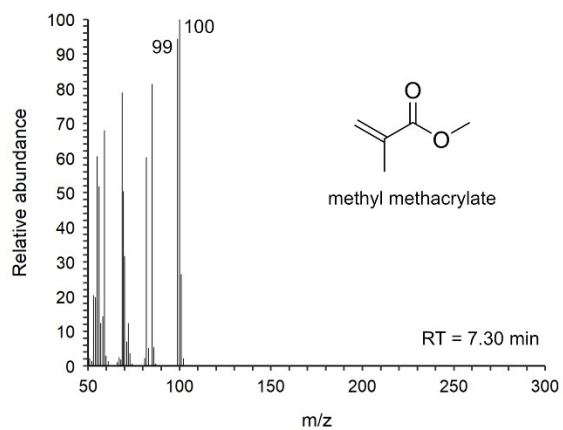

**Figure S18.** Mass spectrum of methyl methacrylate taken from the pyrogram of PMMA above.



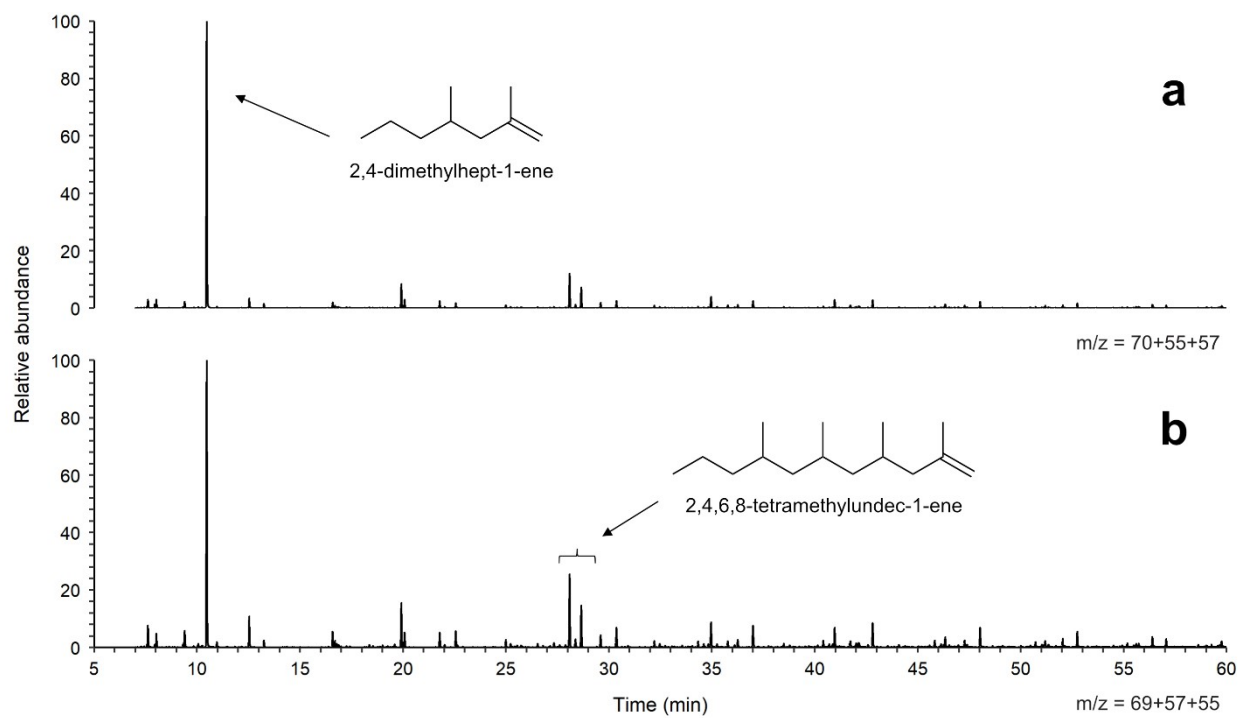

**Figure S19.** Py-GC/MS chromatograms of PP filtered by  $m/z$  (a) 70+55+57 and (b) 69+57+55.

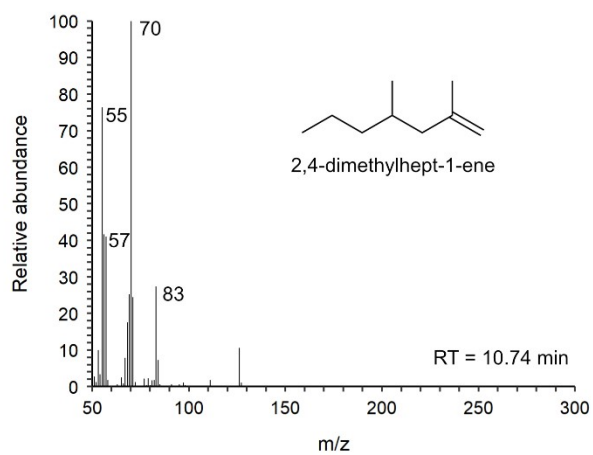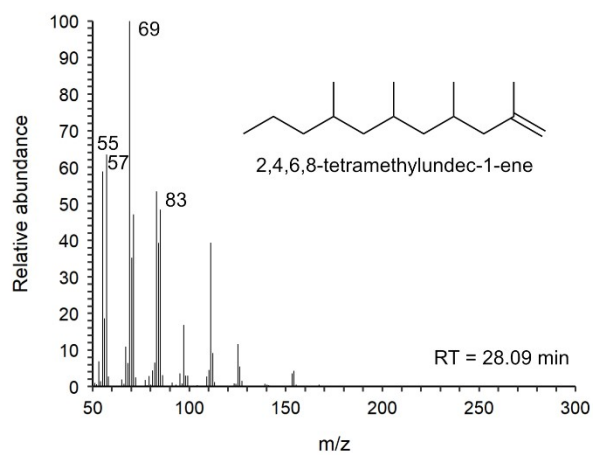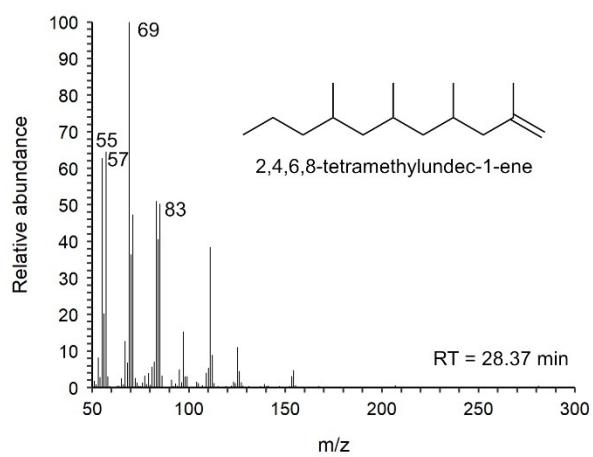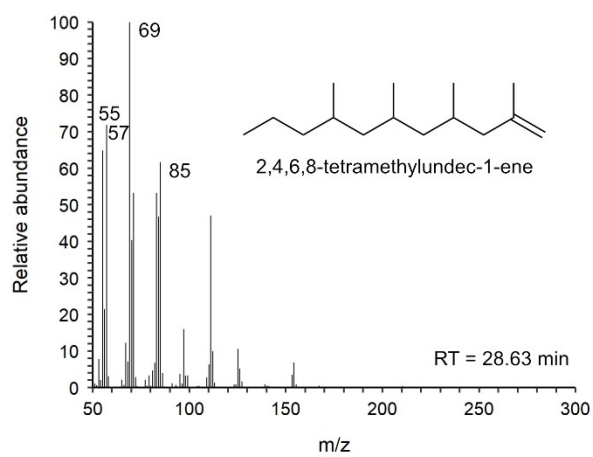

**Figure S20.** Mass spectra of (a) 2,4-dimethylhept-1-ene and (b-d) 2,4,6,8-tetramethylundec-1-ene (isotactic, heterotactic and syndiotactic isomers) taken from the pyrogram of PP above.

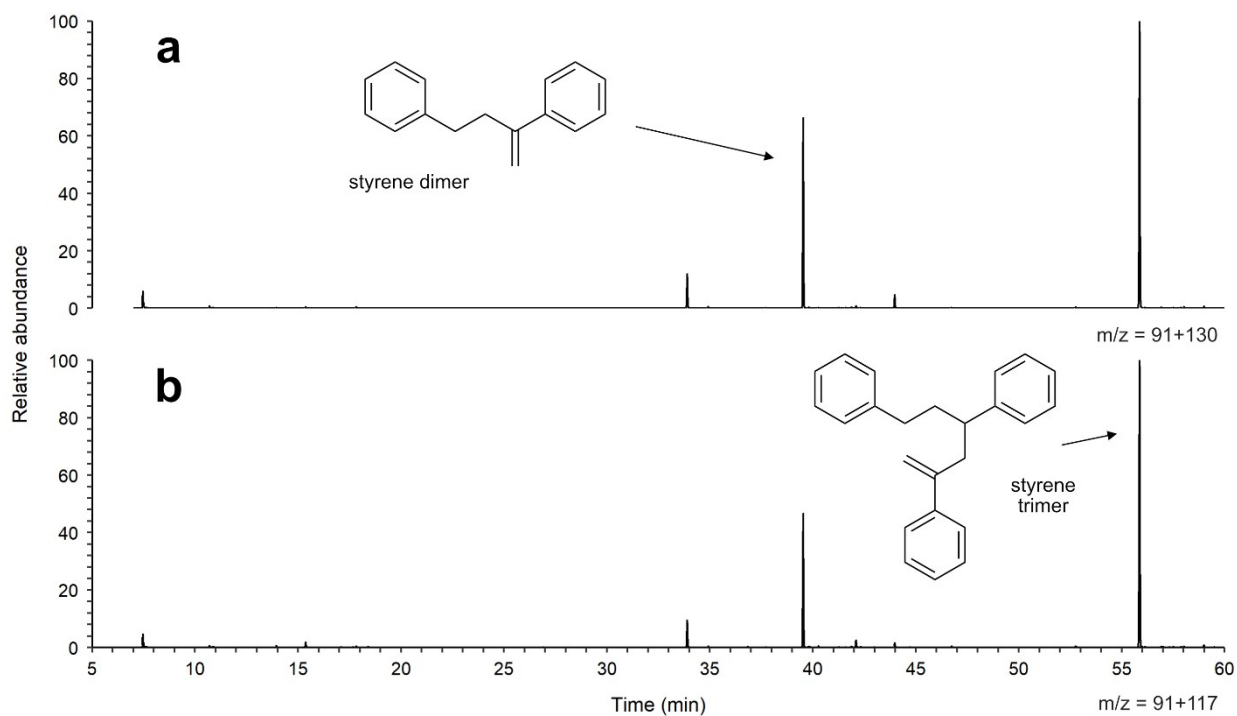

**Figure S21.** Py-GC/MS chromatograms of PS filtered by  $m/z$  (a) 91+130 and (b) 91+117.

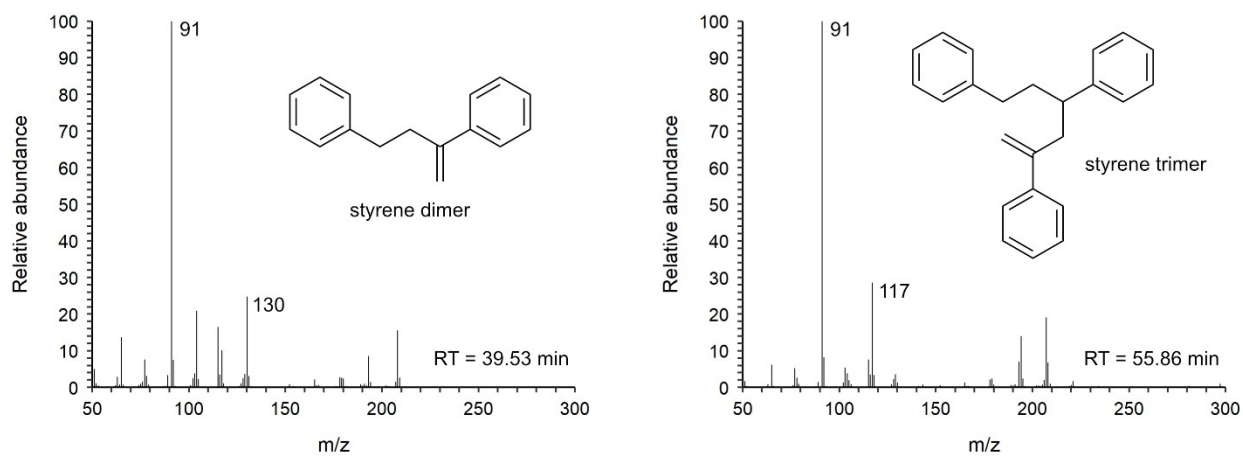

**Figure S22.** Mass spectra of (a) but-3-ene-1,3-diyl dibenzene and (b) hex-5-ene-1,3,5-triyl tribenzene taken from the pyrogram of PS above.

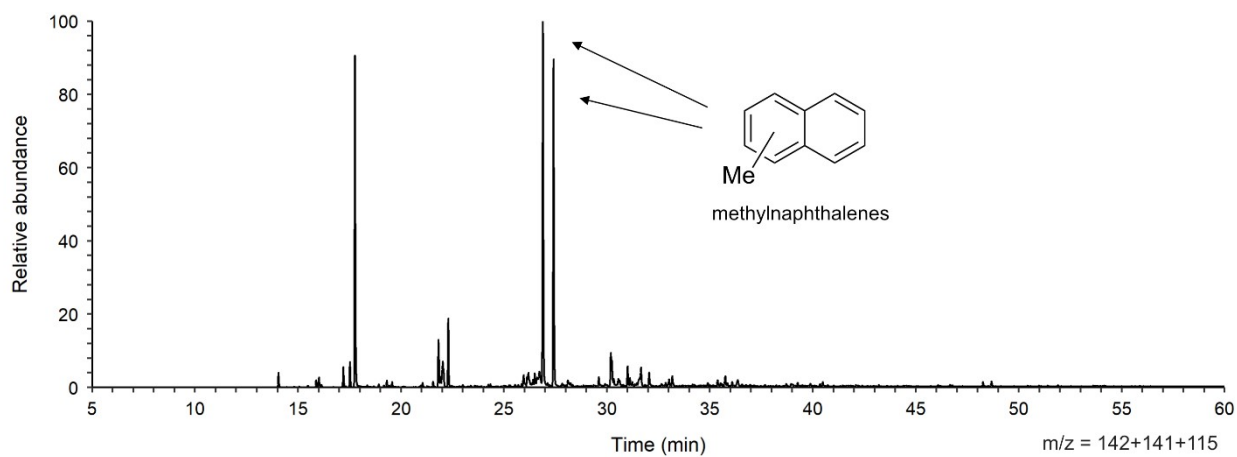

**Figure S23.** Py-GC/MS chromatogram of PVC filtered by  $m/z$  142+141+115.

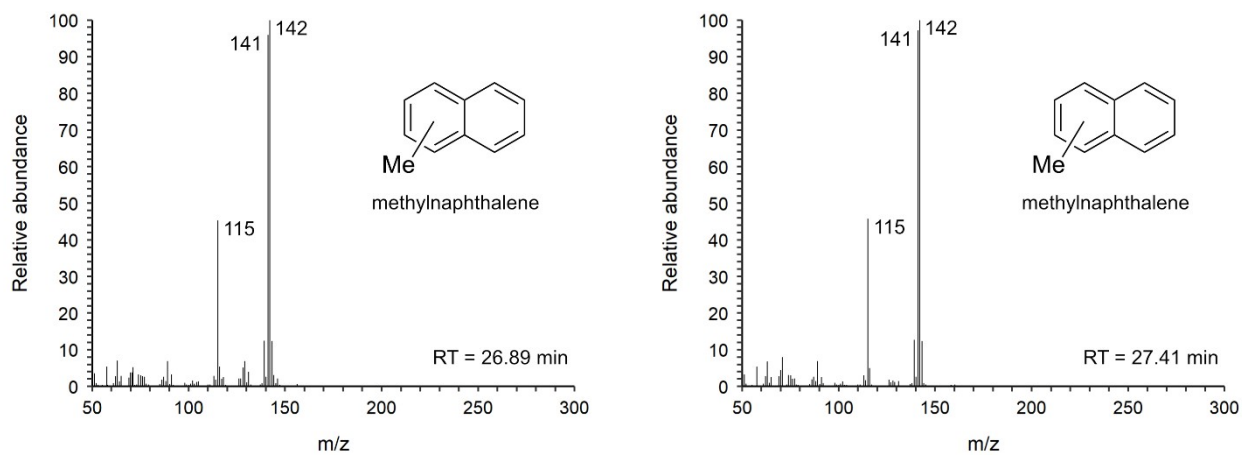

**Figure S24.** Mass spectra of the two methyl-naphthalene isomers taken from the pyrogram of PVC above.

## Recovery of each plastic standard using different extraction methods

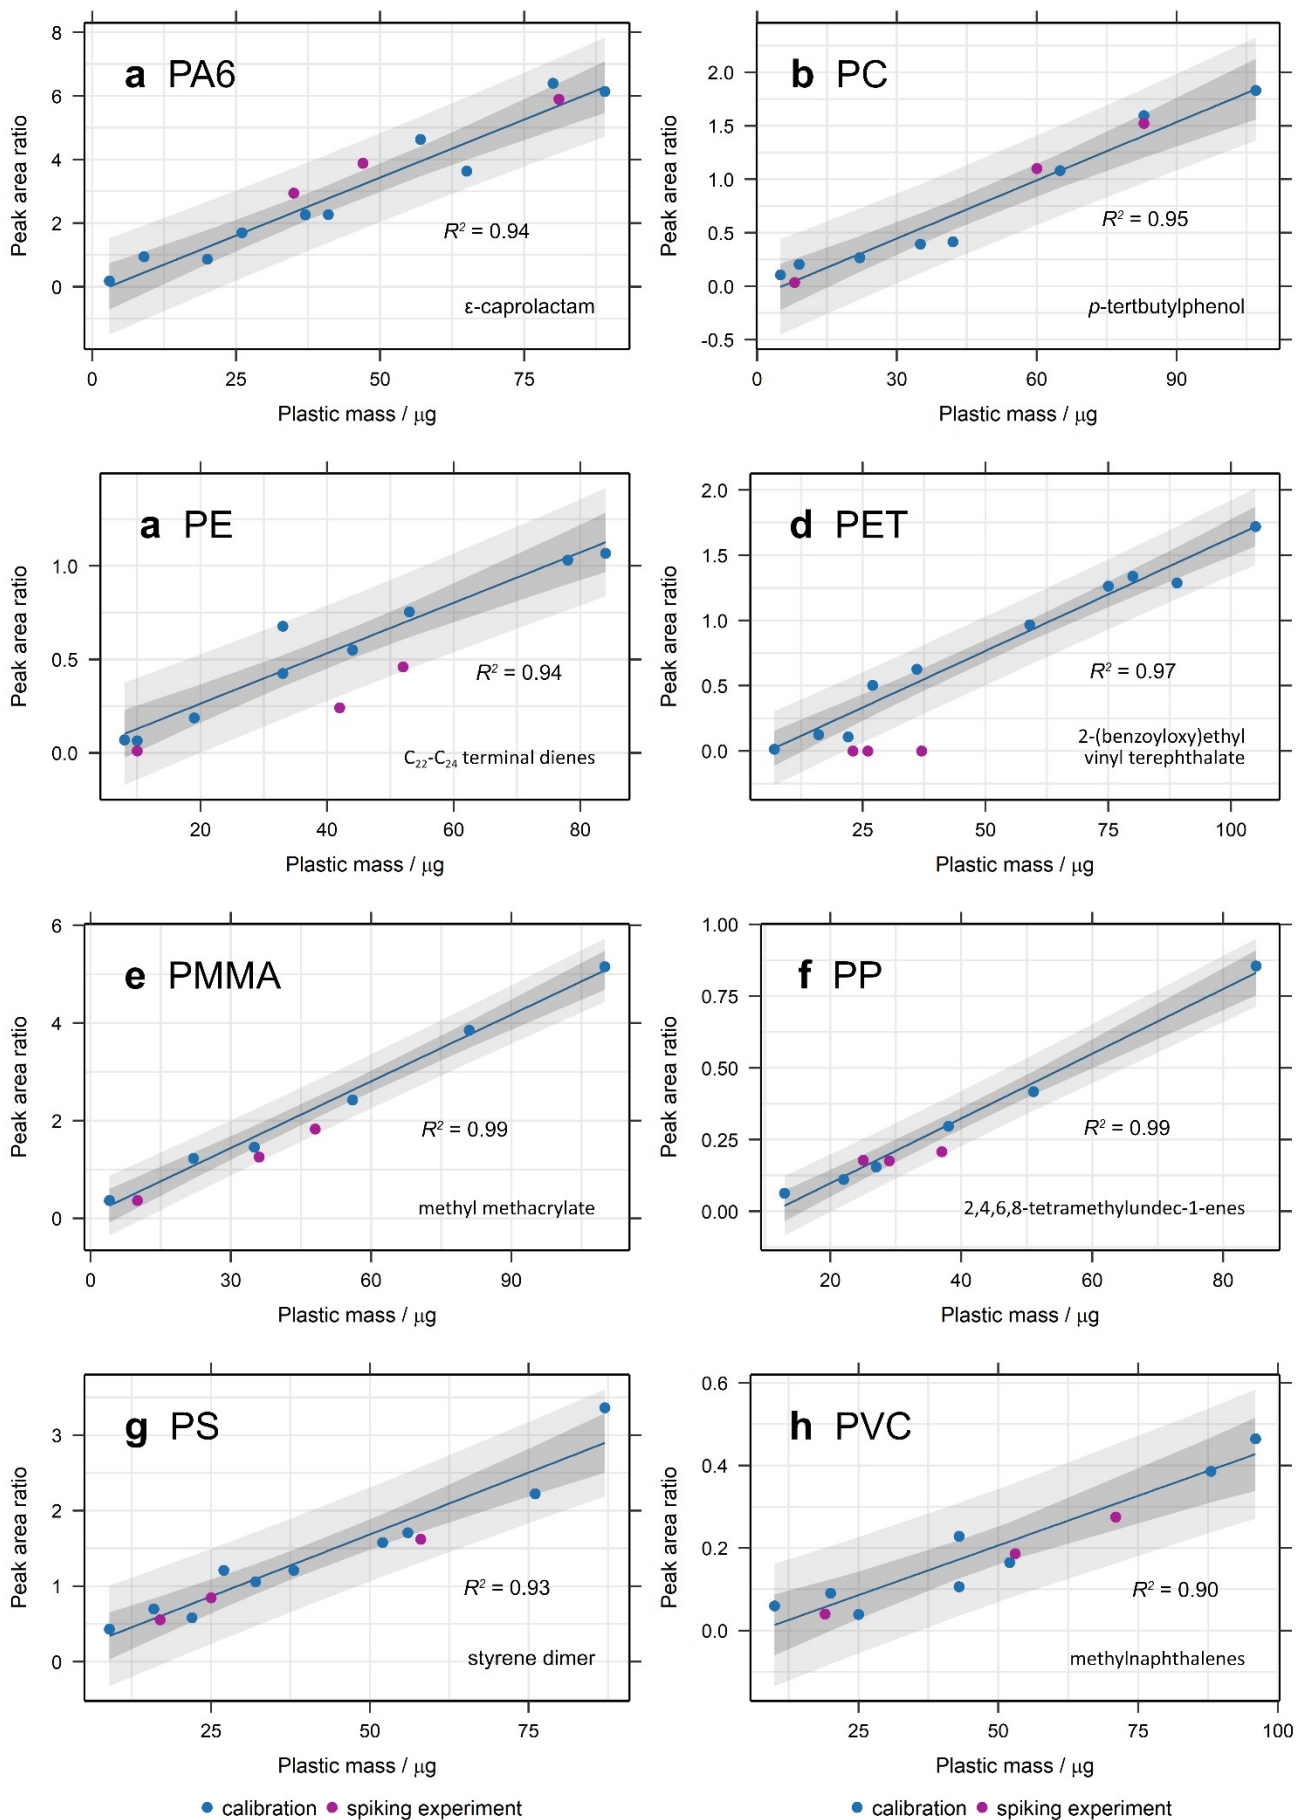

**Figure S25.** Recovery of (a) PA6, (b) PC, (c) PE, (d) PET, (e) PMMA, (f) PP, (g) PS and (h) PVC from spiked sand after density separation *via* overnight settling. Calibration curves were created from the ion chromatogram

peak area ratio of each selected diagnostic compound with anthracene-d<sub>10</sub> or pyrene-d<sub>10</sub> as the internal standard and 95% confidence and prediction bands plotted.

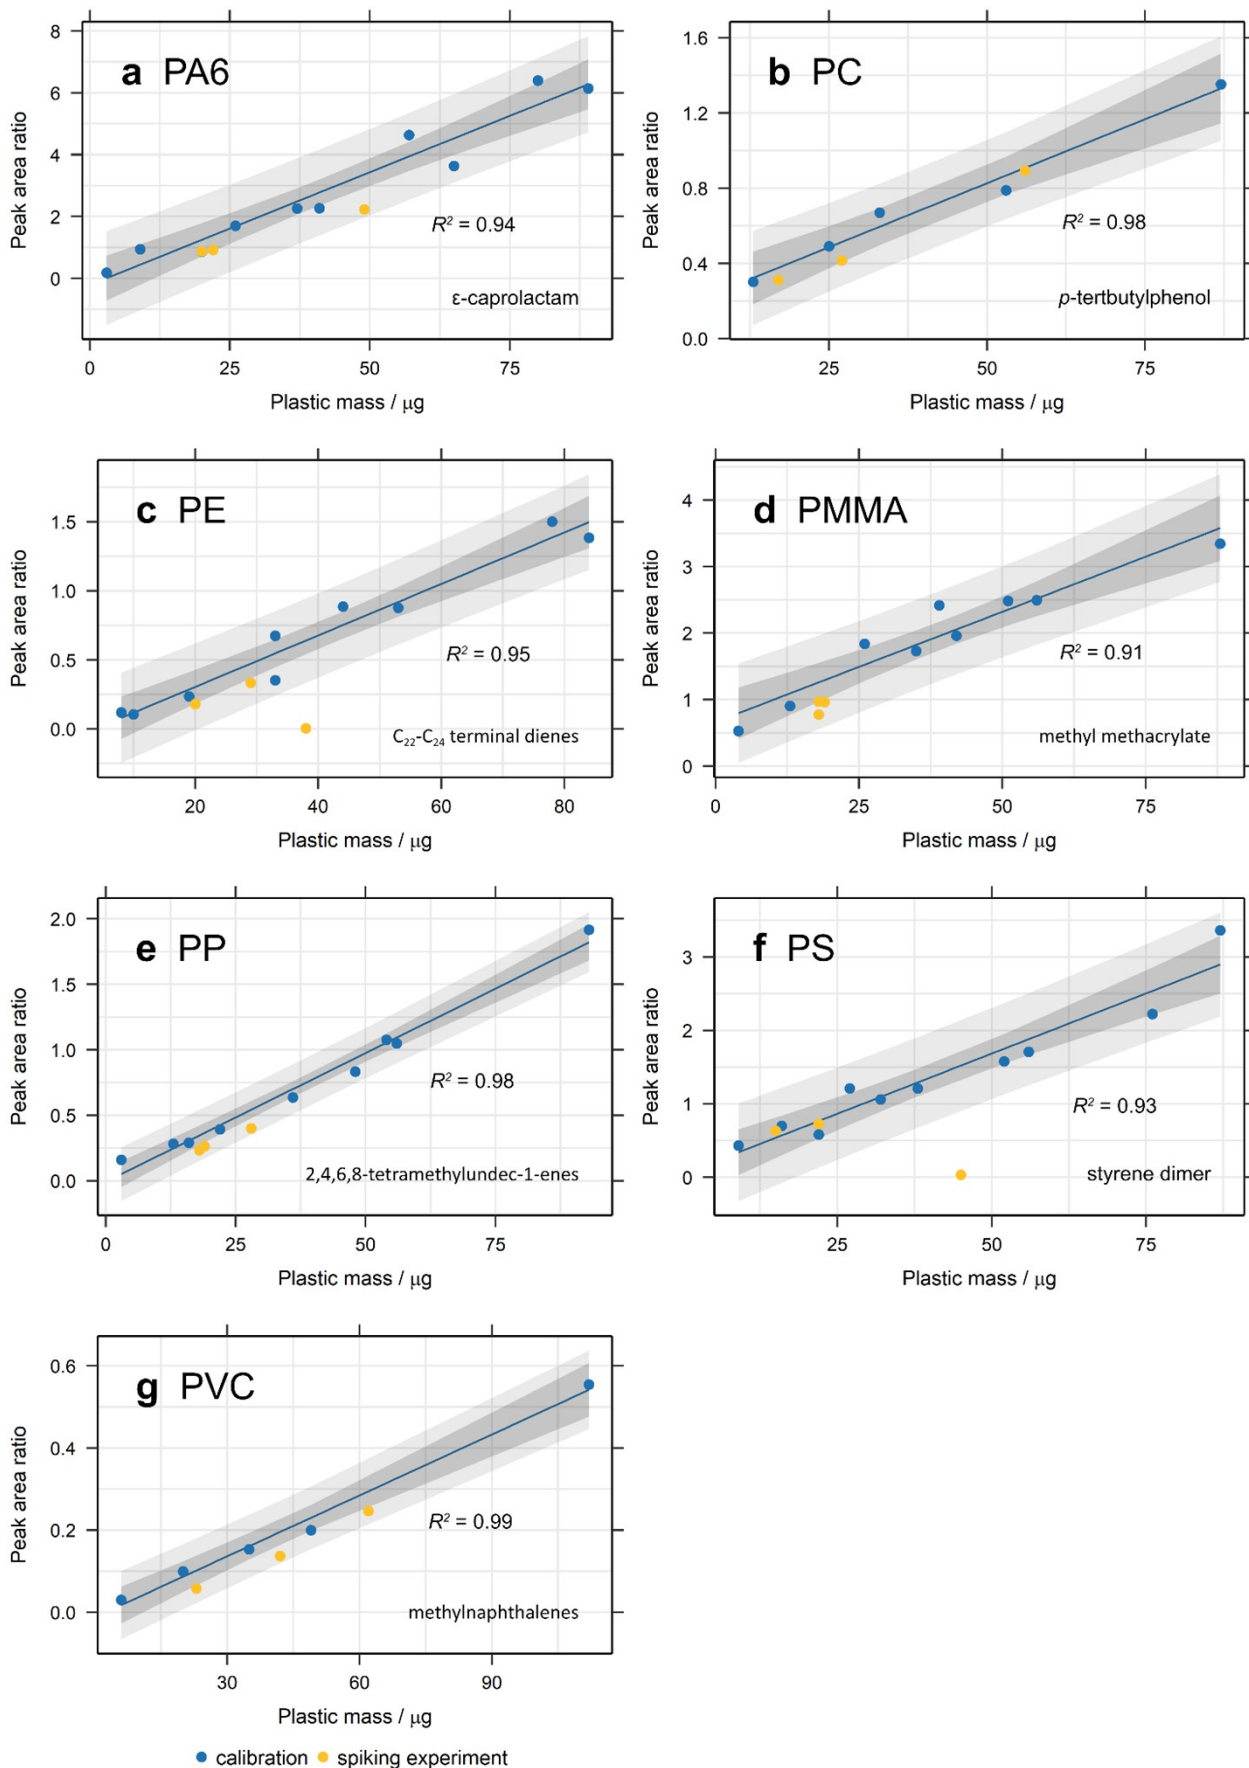

**Figure S26.** Recovery of (a) PA6, (b) PC, (c) PE, (d) PMMA, (e) PP, (f) PS and (g) PVC from spiked soil samples after density separation *via* overnight settling and hydrogen peroxide digestion in a filter holder. Calibration curves were created from the ion chromatogram peak area ratio of each selected diagnostic



compound with anthracene-d<sub>10</sub> or pyrene-d<sub>10</sub> as the internal standard and 95% confidence and prediction bands plotted.
